# Supplementary material for: Positive and negative photopatterning of metal oxides on silicon via bipolar electrochemical deposition
Source: Royal Society of Chemistry journal article supplement (doi:10.1039/b104586p), 2001-01-01
Supplement: b104586p1.doc [file b104586p1.doc]

**Supplementary** **data**

# **Positive and Negative Photopatterning of Metal Oxides on Silicon via Bipolar Electrochemical Deposition**

Hee Cheul Choi and Jillian M. Buriak*

Department of Chemistry, 1393 Brown Laboratories, Purdue University, West Lafayette, IN 47907-1393

E-mail: buriak@purdue.edu

In this supplementary materials section, a description of experimental details, optical micrographs of patterns of CeO2 and Cr2O3 on n- and p-type Si, XRD profiles of ZnO films deposited on n- and p-type Si by processes 1 to 4, 3P, and 4P are included. Cross-sectional and plan SEM views of the electrochemically deposited thin films of ZnO, CeO2, and Cr2O3 on n-type Si, and their XRD spectra are also reported. The final metal oxide films of CeO2 and Cr2O3 are formed by processes 1 or 3.

**Experimental**

**Materials.** The Si wafers utilized are highly doped n-type Si (P doped, R = 0.008 – 0.020 cm, Silicon World, Inc.) or highly doped p-type Si (B doped, R = 0.01 – 0.02 cm, Silicon Sense, Inc.) of a (100) orientation. Metal salts were purchased as follows: 99.9 % purity Zn(II) nitrate hexahydrate from Baker Inc., 99% purity Ce(III) nitrate hexahydrate from Aldrich, and 99% purity Cr(III) nitrate nonahydrate from Aldrich. The metal nitrate electrolytes used for these experiments were prepared using Millipore water (18 ) as 0.1 M aqueous solutions, with the exception of the chromium nitrate system where a 0.01 M solution was used due to its high absorptivity in the visible which inhibits photopatterning at 0.1 M. A box furnace (Lindberg Co., model 51849) was used for the sintering step.

**Deposition and Patterning Procedures.** Electrochemical deposition of ZnO, CeO2, and Cr2O3 on Si single crystal was performed in a home built Teflon cell, identical to those described in the literature for etching of porous silicon and germanium.[[1]](#endnote-2),[[2]](#endnote-3),[[3]](#endnote-4) The back of the Si wafer was in contact with an aluminum tongue while a Pt wire loop was used as the counter electrode. A Princeton Applied Research (PAR) 273 potentiostat/galvanostat served as the current source. An ELH W bulb (300 W, General Electric) was used for white light illumination with a maximum intensity of ~25 mW/cm2 during patterning through a mask. All electrochemical deposition experiments were performed in galvanostatic mode.

**Process 1, unipolar mode followed by *ex situ* sintering:** A typical galvanostatic process was performed by applying a current density of – 5 mA/cm2 (cathodic bias) to the Si electrode for 3 min. The deposited sample was then taken into the furnace for sintering at 350 C for 3 h in air. The temperature was raised to 350 C at a rate of 5 deg/min. For the deposition of Cr2O3, sintering was performed at 850 C.

**Process 2, *in situ* unipolar mode at 60 C:** Unipolar electrochemical treatment was performed using a preheated electrolyte. The cell was wrapped with a heating mantle to keep the temperature constant at 60 ºC during the entire 3 min reaction period. The electrolyte was monitored by an external thermocouple connected to a temperature controller. No extra sintering is carried out in this process.

**Process 3, bipolar mode followed by *ex situ* sintering:** An anodic current density (+ 5 mA/cm2) was applied for 5 s followed by cathodic current density (– 5 mA/cm2) for the next 5 min. Sample was then sintered at 350 C for 3 h in a manner identical to that described in process 1. For the deposition of Cr2O3, sintering was performed at 850 C.

**Process 4, *in situ* bipolar mode at 60 C:** Bipolar electrochemical treatment was performed using a preheated electrolyte for the same lengths of time as process 3.

Electrochemical treatments for the photopatterning processes, processes 1P through 4P (“P” indicates process for “patterning”), are exactly identical to processes 1 through 4 except that the silicon substrates are illuminated through a photomask. Light illumination is not required to induce deposition of metal oxide via these processes; its sole purpose is to pattern the metal oxide on the silicon substrate.

All derivatized samples were subsequently washed fluently with Millipore water, ethanol and pentane, and then dried under N2 flow. For the structure determination, 2 theta () scans were performed using a Siemens powder X-ray diffractometer at 20 mA and 40 kV. For the surface morphology studies of the films and the cross-sectional views of the films, SEM images were taken using a JEOL JSM-35CF scanning electron microscopy at an accelerating voltage of 25 kV.

1. **References**

   ?. E. J. Lee, T. W. Bitner, J. S. Ha, M. J. Shane, M. J. Sailor, *J. Am. Chem. Soc*., 1996, **118**, 5375. [↑](#endnote-ref-2)
2. . J. M. Buriak, M. P. Stewart, T. W. Geders, M. J. Allen, H. C. Choi, J. Smith, D. Raftery, L. T. Canham, *J. Am. Chem. Soc*., 1999, **121**, 11491. [↑](#endnote-ref-3)
3. . H. C. Choi and J. M. Buriak, *Chem. Commun*., 2000, 1669. [↑](#endnote-ref-4)
