# Supplementary material for: Positive and negative photopatterning of metal oxides on silicon via bipolar electrochemical deposition
Source: Royal Society of Chemistry journal article supplement (doi:10.1039/b104586p), 2001-01-01
Supplement: b104586p2.doc [file b104586p2.doc]

**
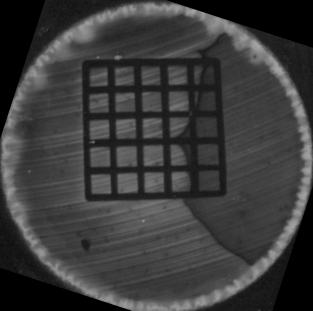

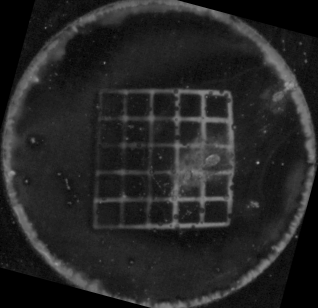

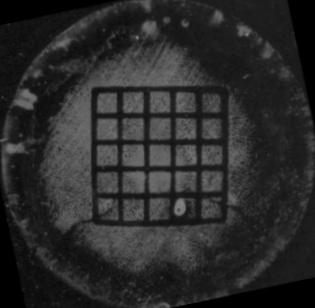

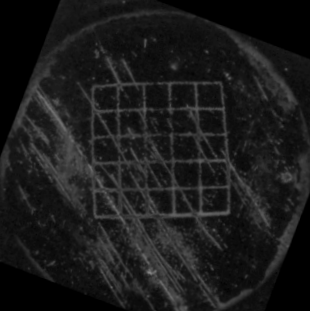
**

(a)

(b)

(c)

(d)

CeO2

Cr2O3

n-type Si

p-type Si

**Figure S1**. Optical micrographs of the patterned CeO2 [(a) and (b)] and Cr2O3 [(c) and (d)] films on n- and p-type Si. The diameter of the circular area is 1.0 cm. The light areas correspond to the metal oxide deposits while the dark areas underivatized Si surfaces.
