# Supplementary material for: Positive and negative photopatterning of metal oxides on silicon via bipolar electrochemical deposition
Source: Royal Society of Chemistry journal article supplement (doi:10.1039/b104586p), 2001-01-01
Supplement: b104586p4.doc [file b104586p4.doc]

(a)

(b)

(c)

(d)


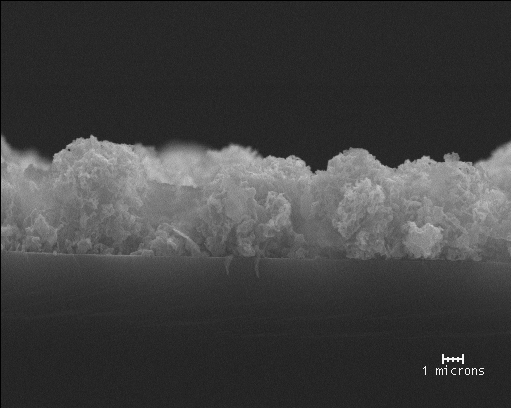

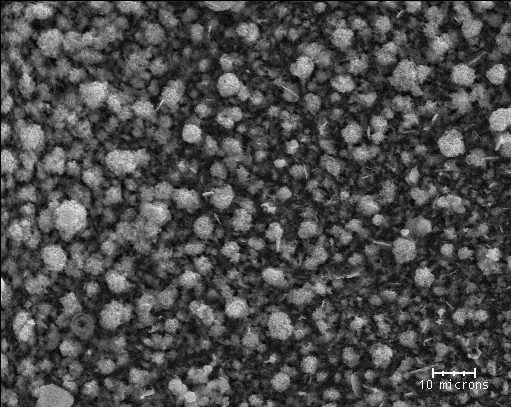

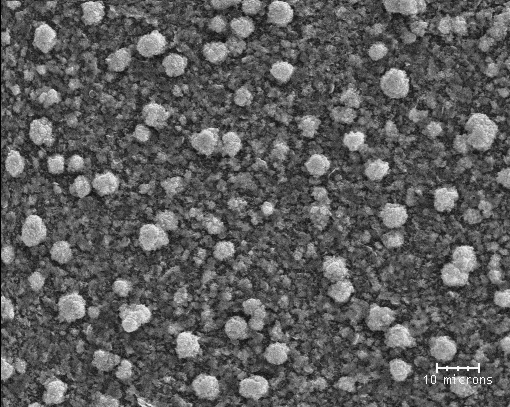

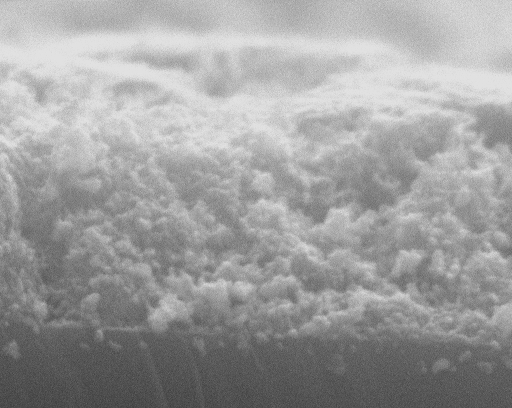


1 microns

**Figure S6.** Cross-sectional and plan SEM views of ZnO film prepared by process 1 [(a), (b)] and process 2 [(c), (d)]. The scale bars are 1 micron in (a) and (c) and10 microns in (b) and (d).
