# Supplementary material for: Positive and negative photopatterning of metal oxides on silicon via bipolar electrochemical deposition
Source: Royal Society of Chemistry journal article supplement (doi:10.1039/b104586p), 2001-01-01
Supplement: b104586p5.doc [file b104586p5.doc]

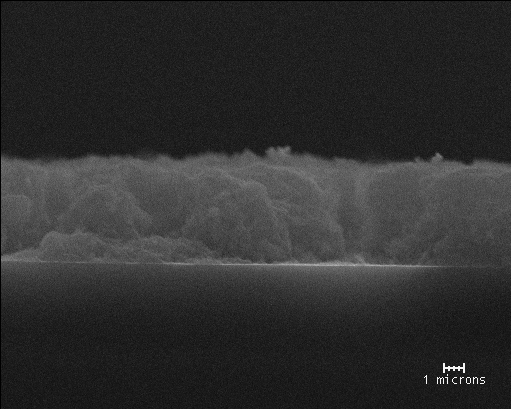

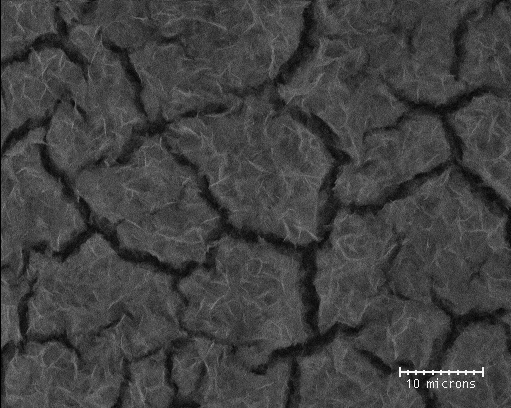

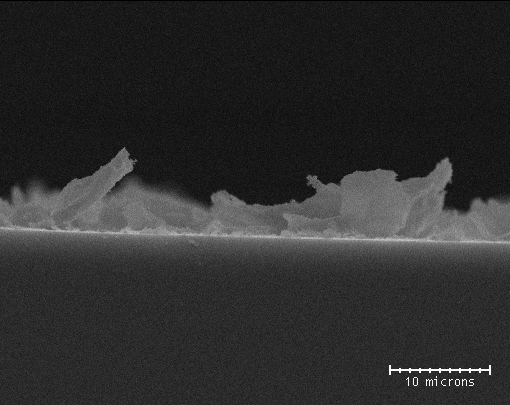

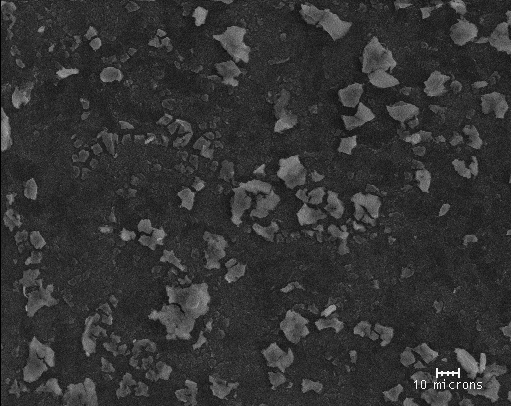


(a)

(b)

(c)

(d)

**Figure S7.** Plan and cross-sectional SEM pictures of the electrochemically deposited CeO2 (a, b) and Cr2O3 (c, d) by process 1.
