# Supplementary material for: Positive and negative photopatterning of metal oxides on silicon via bipolar electrochemical deposition
Source: Royal Society of Chemistry journal article supplement (doi:10.1039/b104586p), 2001-01-01
Supplement: b104586p6.doc [file b104586p6.doc]

(a)

(b)


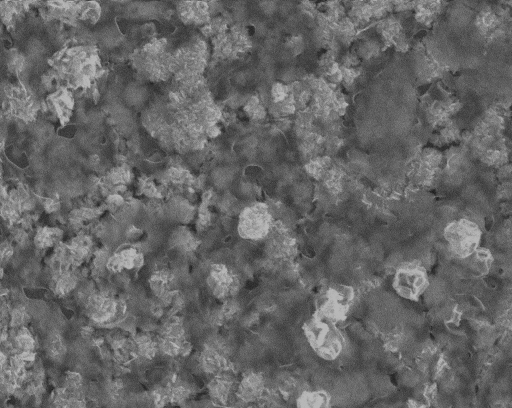


10 microns


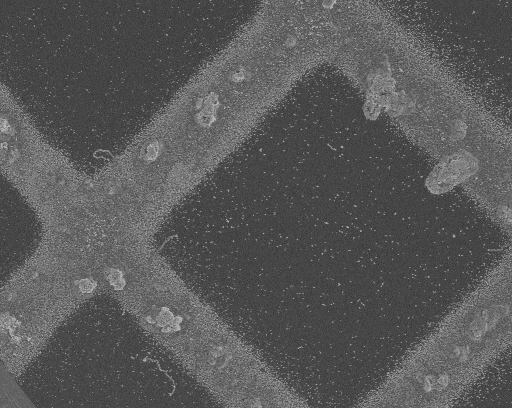


500 microns

**Figure S8.** SEM pictures of the patterned ZnO on p-type Si. Area specific crystal growth is clearly shown in (a), and granular morphologies of ZnO from higher magnification (b).
